# Supplementary material for: Fixed-bed adsorption of Pb(ii) and Cu(ii) from multi-metal aqueous systems onto cellulose-g-hydroxyapatite granules: optimization using response surface methodology
Source: Royal Society of Chemistry journal article supplement (doi:10.1039/d3ra04974d), 2023-01-01
Supplement: d3ra04974d1.pdf [file d3ra04974d1.pdf]

## Electronic Supporting Information (ESI)

### Fixed bed adsorption of Pb (II) and Cu (II) from multi-metal aqueous systems onto Cellulose-g-Hydroxyapatite granulates: Optimization using response surface methodology.

Salah Eddine Marrane<sup>a</sup>, Karim Dänoun<sup>\*bc</sup>, Youness Essamlali<sup>bc</sup>, Soumia Aboulhrouz<sup>bc</sup>, Said Sair<sup>bc</sup>, Othmane Amadine<sup>bc</sup>, Ilham Jioui<sup>bc</sup>, Abdallah Rhihil<sup>a</sup>, Mohamed Zahouily<sup>\*abc</sup>

<sup>a</sup>Laboratory of Materials, Catalysis & Valorization of Natural Resources, Hassan II University, FST-Mohammedia, Morocco.

<sup>b</sup>Moroccan Foundation for Advanced Science, Innovation and Research (MASCIR), Benguerir, Morocco.

<sup>c</sup>Mohammed VI Polytechnic University, Lot 660-Hay Moulay Rachid, Benguerir, Morocco.

E-mail: [m.zahouily@mascir.ma](mailto:m.zahouily@mascir.ma); [karim.DANOUN@um6p.ma](mailto:karim.DANOUN@um6p.ma).

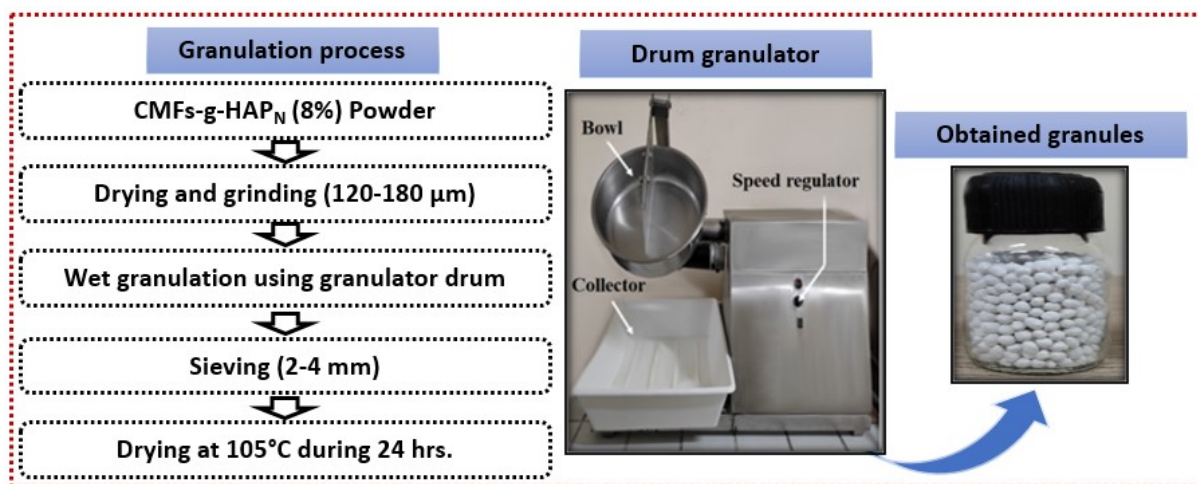

**Scheme S1:** the preparation steps of CMFs-g-HAP<sub>N</sub> (8%) granulates.

**Table S1:** Design matrix for three coded variables together with the actual and predicted responses.

| Runs | Coded values of the variables |       |       |                                 |                                       |                                 |                                       |
|------|-------------------------------|-------|-------|---------------------------------|---------------------------------------|---------------------------------|---------------------------------------|
|      | $X_1$                         | $X_2$ | $X_3$ | $Y_1(\text{Pb}^{2+})$<br>(mg/g) | $\hat{Y}_1(\text{Pb}^{2+})$<br>(mg/g) | $Y_2(\text{Cu}^{2+})$<br>(mg/g) | $\hat{Y}_2(\text{Cu}^{2+})$<br>(mg/g) |
| 1    | 15                            | 6.5   | 30    | 44.53                           | 45.72                                 | 20.65                           | 21.80                                 |
| 2    | 3                             | 6.5   | 30    | 24.99                           | 23.80                                 | 14.32                           | 13.17                                 |
| 3    | 12                            | 11.0  | 30    | 15.19                           | 14.34                                 | 5.5                             | 5.07                                  |
| 4    | 6                             | 2.0   | 30    | 33.87                           | 34.72                                 | 23.9                            | 24.33                                 |
| 5    | 12                            | 2.0   | 30    | 61.5                            | 58.29                                 | 38.43                           | 37.27                                 |
| 6    | 6                             | 11.0  | 30    | 12.78                           | 15.99                                 | 8.22                            | 9.38                                  |
| 7    | 12                            | 8.0   | 50    | 18.85                           | 18.51                                 | 11.28                           | 10.56                                 |
| 8    | 6                             | 5.0   | 10    | 16.11                           | 16.45                                 | 10.67                           | 11.39                                 |
| 9    | 12                            | 5.0   | 10    | 31.88                           | 33.90                                 | 19.3                            | 19.31                                 |
| 10   | 9                             | 9.5   | 10    | 21.97                           | 19.61                                 | 10.33                           | 9.61                                  |
| 11   | 6                             | 8.0   | 50    | 16.05                           | 14.03                                 | 9.86                            | 9.85                                  |
| 12   | 9                             | 3.5   | 50    | 39.67                           | 42.03                                 | 27.32                           | 28.05                                 |
| 13   | 9                             | 6.5   | 30    | 28.76                           | 30.35                                 | 16.22                           | 16.63                                 |
| 14   | 9                             | 6.5   | 30    | 29.07                           | 30.35                                 | 15.77                           | 16.63                                 |
| 15   | 9                             | 6.5   | 30    | 33.23                           | 30.35                                 | 17.9                            | 16.63                                 |

**Table S2:** Estimates and statistics of the coefficients for Pb(II) and Cu(II) adsorption capacities (mg.g<sup>-1</sup>).

| Terms    | Pb(II) adsorption capacity |         |            | Cu(II) adsorption capacity |         |            |
|----------|----------------------------|---------|------------|----------------------------|---------|------------|
|          | Coefficient                | t-Value | P-Value %  | Coefficient                | t-Value | P-Value %  |
| Constant | 30.353                     | 15.58   | < 0.01 *** | 16.630                     | 20.07   | < 0.01 *** |
| $X_1$    | 10.961                     | 6.50    | 0.129 **   | 4.315                      | 6.01    | 0.183 **   |
| $X_2$    | -18.105                    | -10.72  | 0.0122 *** | -13.624                    | -18.97  | < 0.01 *** |
| $X_3$    | 0.960                      | 0.56    | 60.1       | 1.700                      | 2.32    | 6.8        |
| $X_1X_1$ | 4.407                      | 1.43    | 21.2       | 0.855                      | 0.65    | 54.3       |
| $X_2X_2$ | -0.828                     | -0.27   | 79.9       | 2.896                      | 2.21    | 7.8        |
| $X_3X_3$ | -10.721                    | -3.52   | 1.69 *     | -3.845                     | -2.97   | 3.12 *     |
| $X_1X_2$ | -14.572                    | -3.74   | 1.35 *     | -9.967                     | -6.01   | 0.183 **   |
| $X_1X_3$ | -2.852                     | -0.64   | 54.9       | -0.913                     | -0.48   | 65.0       |
| $X_2X_3$ | -16.475                    | -3.70   | 1.40 *     | -8.000                     | -4.23   | 0.827 **   |

**Table S3.** Packed-bed parameters for adsorption Pb (II) and Cu (II) ions by CMFs-g-HAP<sub>N</sub> (8%) fixed bed.

| Tests | Operational conditions     | Metals | V <sub>eff,i</sub><br>(L) | t <sub>p,i</sub><br>(min) | t <sub>s,i</sub><br>(h) | Q <sub>tot</sub><br>of Pb | Q <sub>tot</sub><br>of Cu |
|-------|----------------------------|--------|---------------------------|---------------------------|-------------------------|---------------------------|---------------------------|
| 1     | 15 cm, 30 mg/L ,6.5 mL/min | Pb(II) | 91.32                     | 17                        | 233                     | 44.53                     | 20.65                     |
|       |                            | Cu(II) | 44.63                     | 10                        | 114                     |                           |                           |
| 2     | 3 cm, 30 mg/L ,6.5 mL/min  | Pb(II) | 17.15                     | 7                         | 44                      | 24.99                     | 14.32                     |
|       |                            | Cu(II) | 7.69                      | 5                         | 20                      |                           |                           |
| 3     | 12 cm, 30 mg/L ,11 mL/min  | Pb(II) | 29.96                     | 9                         | 45                      | 15.19                     | 5.5                       |
|       |                            | Cu(II) | 9.87                      | 6                         | 15                      |                           |                           |
| 4     | 6 cm, 30 mg/L ,2 mL/min    | Pb(II) | 20.50                     | 67                        | 164                     | 33.87                     | 23.9                      |
|       |                            | Cu(II) | 14.82                     | 44                        | 122                     |                           |                           |
| 5     | 12 cm, 30 mg/L , 2 mL/min  | Pb(II) | 56.23                     | 86                        | 460                     | 61.5                      | 38.43                     |
|       |                            | Cu(II) | 49.25                     | 60                        | 380                     |                           |                           |
| 6     | 6 cm, 30 mg/L ,11 mL/min   | Pb(II) | 13.69                     | 6                         | 20                      | 12.78                     | 8.22                      |
|       |                            | Cu(II) | 11.33                     | 3                         | 17                      |                           |                           |
| 7     | 12 cm, 50 mg/L , 8 mL/min  | Pb(II) | 12.18                     | 47                        | 25                      | 18.85                     | 11.28                     |
|       |                            | Cu(II) | 9.71                      | 35                        | 20                      |                           |                           |
| 8     | 6 cm, 10 mg/L ,5 mL/min    | Pb(II) | 34                        | 29                        | 113                     | 16.11                     | 10.67                     |
|       |                            | Cu(II) | 19.60                     | 12                        | 65                      |                           |                           |
| 9     | 12 cm, 10 mg/L ,5 mL/min   | Pb(II) | 99.89                     | 48                        | 333                     | 31.88                     | 19.3                      |
|       |                            | Cu(II) | 63.89                     | 24                        | 215                     |                           |                           |
| 10    | 9 cm, 10 mg/L ,9.5 mL/min  | Pb(II) | 52.02                     | 26                        | 91                      | 21.97                     | 10.33                     |
|       |                            | Cu(II) | 34.94                     | 16                        | 62                      |                           |                           |
| 11    | 6 cm, 50 mg/L ,8 mL/min    | Pb(II) | 7.64                      | 72                        | 16                      | 16.05                     | 9.86                      |
|       |                            | Cu(II) | 5.51                      | 38                        | 11                      |                           |                           |
| 12    | 9 cm, 50 mg/L ,3.5 mL/min  | Pb(II) | 27.54                     | 122                       | 131                     | 39.67                     | 27.32                     |
|       |                            | Cu(II) | 21.35                     | 88                        | 102                     |                           |                           |
| 13    | 9 cm, 30 mg/L ,6.5 mL/min  | Pb(II) | 31.64                     | 43                        | 81                      | 28.76                     | 16.22                     |
|       |                            | Cu(II) | 21.95                     | 30                        | 56                      |                           |                           |
| 14    | 9 cm, 30 mg/L ,6.5 mL/min  | Pb(II) | 31.12                     | 41                        | 81                      | 29.07                     | 15.77                     |
|       |                            | Cu(II) | 21.90                     | 28                        | 56                      |                           |                           |
| 15    | 9 cm, 30 mg/L ,6.5 mL/min  | Pb(II) | 31.88                     | 39                        | 81                      | 33.23                     | 17.9                      |
|       |                            | Cu(II) | 21.92                     | 27                        | 56                      |                           |                           |
